# Supplementary material for: Correlated production and consumption of chloromethane in the Arabidopsis thaliana phyllosphere
Source: PubMed Central journal article supplement (PMC5730606; doi:10.1038/s41598-017-17421-y), 2017-12-14
Supplement: 41598_2017_17421_MOESM1_ESM.pdf [file 41598_2017_17421_MOESM1_ESM.pdf]

# 1 **Supplementary Information**

## 2 **Correlated production and consumption of chloromethane in the *Arabidopsis*** 3 ***thaliana* phyllosphere**

4  
5 Muhammad Farhan Ul Haque<sup>1‡</sup>, Ludovic Besaury<sup>1§</sup>, Thierry Nadalig<sup>1</sup>, Françoise Bringel<sup>1</sup>, Jérôme  
6 Mutterer<sup>2</sup>, Hubert Schaller<sup>2</sup> and Stéphane Vuilleumier<sup>1\*</sup>

### 7 8 **Authors and affiliations**

9 <sup>1</sup> Université de Strasbourg, CNRS, GMGM UMR 7156, Department of Microbiology, Genomics and  
10 the Environment, Strasbourg, France

11 <sup>2</sup> Institut de Biologie Moléculaire des Plantes, UPR2357 CNRS, Strasbourg, France

12 <sup>‡</sup> Present address: School of Environmental Sciences, University of East Anglia, Norwich, UK

13 <sup>§</sup> Present address: Université de Reims Champagne Ardenne, INRA, FARE UMR A614, Reims,  
14 France

### 15 16 **\* Corresponding author:**

17 Stéphane Vuilleumier, Université de Strasbourg, Equipe Adaptations et Interactions Microbiennes  
18 dans l'Environnement, Département Microorganismes, Génomes, Environnement, UMR 7156  
19 UNISTRA - CNRS, 28 rue Goethe, F-67000 Strasbourg, France, phone: +33-3-68-85-2022; fax: +33-  
20 3-68-85-1926; e-mail: [vuilleumier@unistra.fr](mailto:vuilleumier@unistra.fr)

21

## 22 **Supplementary Information**

### 23 ***HOL1* genotyping of plants**

24 Wild-type (Col-0) and *HOL1* gene variants of *A. thaliana* were screened by performing two sets of  
25 PCR reactions. The first PCR was performed using gene specific primer pair (hol1 and hol2, Table  
26 S3) to confirm homozygosity of mutants. The second PCR was performed using primer hol1 and T-  
27 DNA specific primer jmlb2 (Supplementary Table S1) to confirm T-DNA insertion. Each PCR  
28 reaction mix (25  $\mu$ L) contained 2.5  $\mu$ L PCR buffer 10x (Tris-HCl 10 mM at pH 9.0, KCl 50 mM, MgCl<sub>2</sub>  
29 1.5 mM, Triton 0.1% and BSA 0.2 mg mL<sup>-1</sup>), 0.4  $\mu$ M of each primer, 0.12  $\mu$ M of each dNTPs, 0.2  $\mu$ L  
30 Taq DNA polymerase (5 U  $\mu$ L<sup>-1</sup>, Q biogene) and ultrapure filtered sterilised water. The PCR program  
31 involved initial denaturation at 95°C for 3 mins, followed by 35 cycles of three steps (94°C for 1  
32 min, 60°C for 1 min and 72°C for 45 seconds), and final elongation at 72°C for 3 mins. PCR products  
33 were visualised under UV light using a Geldoc apparatus (Bio-Rad) after agarose gel  
34 electrophoresis.

35

### 36 **Gene copy number calculation**

37 Calibration curves were obtained to determine the gene copy number of *cmuA* and 16S rDNA per  
38  $\mu$ g of template in the phyllosphere using tenfold dilution series of standards (10 ng to 10 fg,  
39 Supplementary Fig. S1) of *M. extorquens* CM4 genomic DNA. *M. extorquens* CM4 genome contain  
40 5 copies of the 16S rRNA gene and 1 copy of the *cmuA* gene<sup>1</sup>. Assuming average molecular masses  
41 of 650 Daltons (Da) for a nucleotide pair of double-stranded DNA, gene copy number for a given  
42 quantity of standard for the calibration curve was calculated by [quantity (ng) / L (bp) x 650 (Da) x  
43 10<sup>-9</sup>] x 6.02 x 10<sup>23</sup> x [copy number of gene per genome] where L is the sequence length (6180732  
44 bp for *M. extorquens* CM4 strain). To calculate *syfp2* copy number, plasmid pME8266 (6381 bp,  
45 with 1 copy of *syfp2*)<sup>2</sup> was used as the standard. Threshold cycle (Ct) values were plotted against

46 copy number of serially diluted DNA standards, and the linear relationship obtained was used to  
47 calculate the number of gene copies per  $\mu\text{g}$  of phyllosphere DNA template in qPCR.

48

49 **Supplementary Figures**

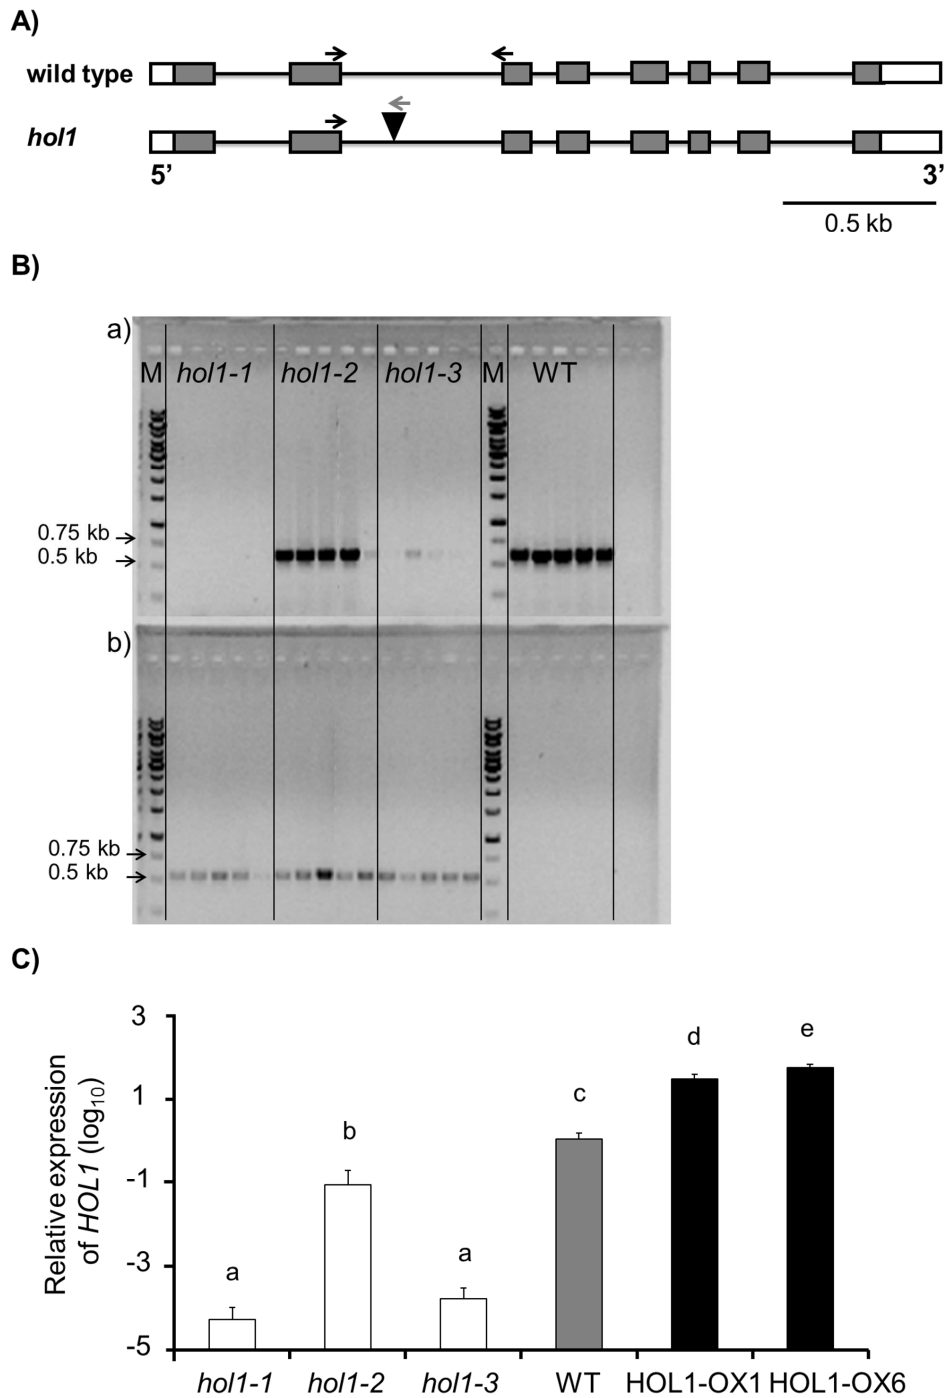

50

51 **Fig. S1. Screening of *HOL1* variants of *A. thaliana*.**

52 A) Organisation of gene *HOL1* in *A. thaliana* wild type (Col-0), based on locus data from the  
 53 *Arabidopsis* Information Resource (<http://www.arabidopsis.org>). Gene *HOL1* comprises 8 exons  
 54 (boxes) and 7 introns (lines) and encodes a 227- amino acids methyltransferase protein. The T-DNA

55 site of insertion in *hol1* mutant plants is shown (black triangle). Position of wild-type sequence  
56 *hol1* and *hol2* primers (black) and T-DNA primer *jmlb2* (grey) used for genotyping are shown (see  
57 Table S3 for primer sequences).

58 B) Genotyping of gene *HOL1* in *A. thaliana* wild type (Col-0) and three independent lines (*hol1-1*,  
59 *hol1-2* and *hol1-3*) of *hol1* mutant plants using wild type primer pair *hol1-hol2* (a) and T-DNA  
60 primer pair *hol1-jmlb2* (b). M, marker line.

61 C) Relative expression of gene *HOL1* in wild-type *A. thaliana* *hol1* mutant lines, and *HOL1*  
62 overexpressor lines (*HOL1-OX1* and *HOL1-OX6*), as measured by qRT-PCR (see Materials and  
63 Methods for calculation). Error bars represent the standard deviation of at least five biological  
64 replicates, and small letters (a – e) show statistical significance at  $p < 0.05$  by Student's t-test. The 2  
65 *A. thaliana* lines with lowest (*hol1-1*) and highest (*HOL1-OX6*) expression of *HOL1* were selected for  
66 subsequent experiments.

67

68

69

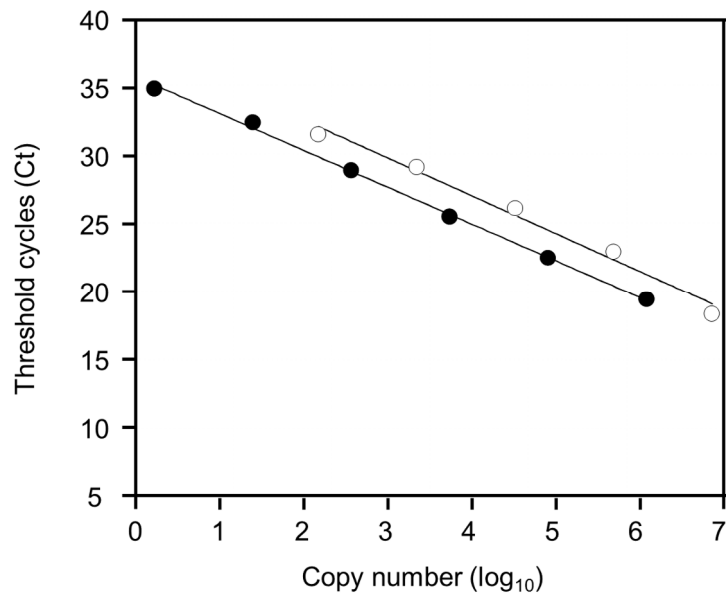

70

71 **Fig. S2. Calibration curve for 16S rRNA and *cmuA* genes.** Serial tenfold dilutions of standards (10  
72 ng – 1 fg) of *M. extorquens* CM4 total DNA were used as template for qPCR, and the results  
73 expressed with DNA as gene copies against threshold cycle (Ct) values. Linear regression lines are  
74  $y = 41.206 - 3.225x$  ( $R=0.999$ ) and  $y = 38.759 - 3.136x$  ( $R=0.992$ ) for 16S rRNA (white) and *cmuA*  
75 (black) respectively.

76 **Supplementary Tables**77 **Table S1. *cmuA* and 16S rRNA gene copies per mg of fresh leaf as measured by qPCR.**

|                         | <i>cmuA</i>    | 16S rRNA                      |
|-------------------------|----------------|-------------------------------|
| <b>Leaf surface DNA</b> |                |                               |
| <i>hol1</i>             | 13.5 (± 3.2)   | 7.0 (± 5.6) · 10 <sup>5</sup> |
| WT                      | 70.5 (± 27.6)  | 4.9 (± 0.4) · 10 <sup>5</sup> |
| HOL1-OX                 | 157.2 (± 43.0) | 6.2 (± 2.4) · 10 <sup>5</sup> |
| <b>Leaf total DNA</b>   |                |                               |
| <i>hol1</i>             | 22.2 (± 15.9)  | 4.9 (± 0.7) · 10 <sup>7</sup> |
| WT                      | 85.8 (± 9.6)   | 6.9 (± 3.1) · 10 <sup>7</sup> |
| HOL1-OX                 | 164.7 (± 36.1) | 3.2 (± 0.5) · 10 <sup>7</sup> |

78

79

80 **Table S2. *syfp2* gene copies per mg of fresh leaves inoculated with bioreporter as measured by**  
81 **qPCR.**

| Plant type     | <i>syfp2</i> copies per mg of fresh leaves |
|----------------|--------------------------------------------|
| <i>hol1</i>    | $5.3 (\pm 0.2) \cdot 10^5$                 |
| WT             | $4.4 (\pm 0.2) \cdot 10^5$                 |
| HOL1-OX        | $6.1 (\pm 0.3) \cdot 10^5$                 |
| not inoculated | $1.2 (\pm 0.6) \cdot 10^0$                 |

82



83 **Table S3. Primers used in the study**

84

| 85  | <b>Target (purpose)</b>            |           | <b>Primer sequence 5' – 3' <sup>a</sup></b> | <b>Reference</b> |
|-----|------------------------------------|-----------|---------------------------------------------|------------------|
| 86  | <hr/>                              |           |                                             |                  |
| 87  | <i>Primers for bacterial genes</i> |           |                                             |                  |
| 88  | <i>cmuA</i>                        | cmuA802F  | TTCAACGGCGAYATGTATCCYGG                     | 3                |
| 89  | (qPCR)                             | cmuA968R  | CCRCCRTTRTAVCCVACYTC                        | 4                |
| 90  | 16S rRNA                           | Bact1369F | CGGTGAATACGTTTCYCGG                         | 5                |
| 91  | (qPCR)                             | Prok1492R | GGWTACCTTGTTACGACTT                         | 5                |
| 92  | <i>syfp2</i>                       | MF34      | ACAAGCAGAAGAACGGCATC                        | 2                |
| 93  | (qPCR)                             | MF35      | GCTTGGACTGGTAGCTCAGG                        | 2                |
| 94  | 16S rRNA                           | Gray28F   | GAGTTTGATCNTGGCTCAG                         | 6                |
| 95  | (454)                              | Gray519R  | GTNTTACNGCGGCKGCTG                          | 7                |
| 96  | <i>cmuA</i>                        | cmuA802F  | TTCAACGGCGAYATGTATCCYGG                     | 3                |
| 97  | (454)                              | cmuA1244R | TABTCCATDATGGCYTCGAC                        | this study       |
| 98  | <hr/>                              |           |                                             |                  |
| 99  | <i>Primers for plant genes</i>     |           |                                             |                  |
| 100 | <i>HOL1</i>                        | hol1      | GGAGTCAGTCTTCTTAGCTTACC                     | 8                |
| 101 | (genotyping)                       | hol2      | GTGCGCTTTCGGAAATATCCAATCC                   | 8                |
| 102 | T-DNA                              | jmb12     | TTGGGTGATGGTTCACGTAGTGGG                    | 8                |
| 103 | insertion                          |           |                                             |                  |
| 104 | <i>HOL1</i>                        | holqPCR_F | GAAAGCGCACTCGCGAAAGCTAAT                    | this study       |
| 105 | (qPCR)                             | holqPCR_R | ATGCAGGTCTCATCTCCGGTTCAA                    | this study       |
| 106 | <i>ACTIN2</i>                      | SS77      | TTCAATGTCCCTGCCATGTATG                      | 9                |
| 107 | (qPCR)                             | SS78      | AATACCGGTTGTACGACCAC                        | 99               |

108

109 <sup>a</sup> Equimolar mixtures at degenerate positions: N (G,A,T,C); V (G,A,C); D (G,A,T); B (G,T,C); R (G,A); K  
 110 (G,T); W (A,T); Y (T,C).



## References

- 1 Marx, C. J. *et al.* Complete genome sequences of six strains of the genus *Methylobacterium*. *J. Bacteriol.* **194**, 4746-4748 (2012).
- 2 Farhan Ul Haque, M., Nadalig, T., Bringel, F., Schaller, H. & Vuilleumier, S. Fluorescence-based bacterial bioreporter for specific detection of methyl halide emissions in the environment. *Appl. Environ. Microbiol.* **79**, 6561-6567 (2013).
- 3 Miller, L. G. *et al.* Degradation of methyl bromide and methyl chloride in soil microcosms: Use of stable C isotope fractionation and stable isotope probing to identify reactions and the responsible microorganisms. *Geochim. Cosmochim. Acta* **68**, 3271-3283 (2004).
- 4 Nadalig, T. *et al.* Detection and isolation of chloromethane-degrading bacteria from the *Arabidopsis thaliana* phyllosphere, and characterization of chloromethane utilisation genes. *FEMS Microbiol. Ecol.* **77**, 438-448 (2011).
- 5 Suzuki, M. T., Taylor, L. T. & DeLong, E. F. Quantitative Analysis of Small-Subunit rRNA Genes in Mixed Microbial Populations via 5'-Nuclease Assays. *Appl. Environmental Microbiol.* **66**, 4605-4614 (2000).
- 6 Handl, S., Dowd, S. E., Garcia-Mazcorro, J. F., Steiner, J. M. & Suchodolski, J. S. Massive parallel 16S rRNA gene pyrosequencing reveals highly diverse fecal bacterial and fungal communities in healthy dogs and cats. *FEMS Microbiol. Ecol.* **76**, 301-310 (2011).
- 7 Ishak, H. D. *et al.* Bacterial diversity in *Solenopsis invicta* and *Solenopsis geminata* ant colonies characterized by 16S amplicon 454 pyrosequencing. *Microb. Ecol.* **61**, 821-831 (2011).

- 8 Rhew, R. C., Ostergaard, L., Saltzman, E. S. & Yanofsky, M. F. Genetic control of methyl halide production in *Arabidopsis*. *Current Biol.* **13**, 1809-1813 (2003).
- 9 Bouvier-Navé, P. *et al.* Involvement of the phospholipid sterol acyltransferase1 in plant sterol homeostasis and leaf senescence. *Plant Physiology* **152**, 107-119 (2010).
